## **Elevated plasma phosphorylated tau 181 in amyotrophic lateral sclerosis relates to lower motor neuron dysfunction**

Katheryn A.Q. Cousins, PhD<sup>1</sup>, Leslie M. Shaw, PhD<sup>2</sup>, Sanjana Shellikeri, PhD<sup>1</sup>, Laynie Dratch, ScM, CGC<sup>1</sup>, Luis Rosario<sup>1</sup>, Lauren B. Elman, MD<sup>1</sup>, Colin Quinn, MD<sup>1</sup>, Defne A. Amado, MD, PhD<sup>1</sup>, David A. Wolk, MD<sup>1</sup>, Thomas F. Tropea, DO<sup>1</sup>, Alice Chen-Plotkin, David J. Irwin, MD<sup>1</sup>, Murray Grossman, MDCM, EdD<sup>1</sup>, Edward B. Lee, MD, PhD<sup>2</sup>, John Q. Trojanowski, MD, PhD<sup>2</sup>, Corey T. McMillan, PhD<sup>1</sup>

April 06, 2022

Department of Neurology, Perelman School of Medicine<sup>1</sup>, Department of Pathology and Laboratory Medicine<sup>2</sup> University of Pennsylvania.

Correspondence should be addressed to Katheryn Cousins Department of Neurology Richards Medical Research Laboratories, Suite 600B  
3700 Hamilton Walk  
Philadelphia, PA 19104  
*katheryn.cousins@pennmedicine.upenn.edu*

Running head: **Elevated plasma p-tau in ALS**

## Abstract

**Objective:** Plasma phosphorylated tau (p-tau<sub>181</sub>) is reliably elevated in Alzheimer's disease (AD), but less explored is its specificity relative to other neurodegenerative conditions. Here we find novel evidence that plasma p-tau<sub>181</sub> is elevated in amyotrophic lateral sclerosis (ALS), a neurodegenerative condition typically lacking tau pathology. We performed a detailed clinical evaluation to unravel the potential source of this unexpected observation.

**Methods:** Patients were clinically or pathologically diagnosed with ALS (n=130) or AD (n=82), or were healthy non-impaired controls (n=33). Receiver operating characteristic (ROC) curves were analyzed and area under the curve (AUC) was used to discriminate AD from ALS. Within ALS, Mann-Whitney-Wilcoxon tests compared analytes by presence/absence of upper motor neuron (UMN) and lower motor neuron (LMN) signs. Spearman correlations tested associations between plasma p-tau<sub>181</sub> and postmortem neuron loss.

**Results:** A Wilcoxon test showed plasma p-tau<sub>181</sub> was higher in ALS than controls ( $W=3297$ ,  $p=0.0000020$ ), and ROC analyses showed plasma p-tau<sub>181</sub> poorly discriminated AD and ALS (AUC=0.60). In ALS, elevated plasma p-tau<sub>181</sub> was associated with LMN signs in cervical ( $W=827$ ,  $p=0.0072$ ), thoracic ( $W=469$ ,  $p=0.00025$ ), and lumbosacral regions ( $W=851$ ,  $p=0.0000029$ ). In support of LMN findings, plasma p-tau<sub>181</sub> was associated with neuron loss in the spinal cord ( $\rho=0.46$ ,  $p=0.017$ ), but not in the motor cortex ( $p=0.41$ ). CSF p-tau<sub>181</sub> and plasma neurofilament light chain (NfL) were included as reference analytes, and demonstrate specificity of findings.

**Interpretation:** We found strong evidence that plasma p-tau<sub>181</sub> is elevated in ALS and may be a novel marker specific to LMN dysfunction.

## 1. Introduction

Emerging plasma-based biomarkers of neurodegenerative disease meet the need for inexpensive, less invasive, and accurate diagnostic tools. In particular, elevated phosphorylated tau at threonine 181 (p-tau<sub>181</sub>) in plasma has been shown to be a highly accurate marker of Alzheimer's disease (AD),<sup>1,2</sup> and increased plasma p-tau<sub>181</sub> is associated with amyloid- $\beta$  plaques and tau-positive tangle neuropathology.<sup>3</sup> Likewise, plasma p-tau<sub>181</sub> is highly correlated with cerebrospinal spinal fluid (CSF) p-tau<sub>181</sub> concentrations in AD,<sup>4</sup> further supporting its reliability as a marker of AD brain alterations. However, unlike CSF which has direct contact with the brain, analyte concentrations in plasma may be influenced by disease events peripheral to the brain, not yet described.

A recent study from our group tested diagnostic accuracy of plasma p-tau<sub>181</sub> in AD, but unexpectedly found high levels of p-tau<sub>181</sub> in 11 patients with amyotrophic lateral sclerosis (ALS),<sup>5</sup> a neurodegenerative condition involving upper motor neuron (UMN) and lower motor neuron (LMN) disease.<sup>6</sup> Here we expand on this preliminary observation; we show new evidence that plasma p-tau<sub>181</sub> is elevated in ALS patients. This is despite the fact that ALS is associated with TAR DNA-binding protein 43 (TDP-43) or SOD1 pathology, with little tau accumulation.<sup>7</sup>

We are aware of no previous studies that have investigated plasma p-tau<sub>181</sub> in ALS, however our finding of elevated plasma p-tau<sub>181</sub> is in contrast to consistently low concentrations of CSF p-tau<sub>181</sub> observed in ALS.<sup>8,9</sup> Moreover, studies of plasma p-tau<sub>181</sub> in frontotemporal lobar degeneration associated with TDP-43 (FTLD-TDP) show that plasma p-tau<sub>181</sub> is significantly lower in FTLD-TDP than AD,<sup>10</sup> mirroring the relationship seen in CSF.<sup>11</sup> These findings may indicate a potential disassociation between CSF and plasma p-tau<sub>181</sub> in ALS, but not AD or FTLD.

In the first part of this study, we compared analyte concentrations and their diagnostic accuracy in ALS, AD, and cognitively unimpaired, healthy controls. Analyses compared plasma p-tau<sub>181</sub> to plasma NfL, which has been previously identified as a marker in ALS,<sup>12-14</sup> and to CSF p-tau<sub>181</sub>. We confirmed that elevated plasma p-tau<sub>181</sub> was not due to co-occurring AD pathology by repeating comparisons in a subset of patients with autopsy-confirmed ALS and AD.

Given our finding that plasma p-tau<sub>181</sub> was highly elevated in ALS, the second part of this study focused on ALS. We performed a detailed analysis to explore if plasma p-tau<sub>181</sub> was related to clinical or pathologic features of ALS. First, correlations investigated divergences between plasma and CSF biomarkers within ALS. We next tested whether plasma p-tau<sub>181</sub> was associated with lower motor neuron (LMN) and/or upper motor neuron (UMN) dysfunction in ALS. To test the specificity of our findings, we compared plasma p-tau<sub>181</sub> to plasma NfL and CSF p-tau<sub>181</sub> in ALS. We next investigated the clinical significance of plasma p-tau<sub>181</sub> by testing its association with ALS clinical outcomes, including seated forced vital capacity (FVC) and the revised ALS functional rating scale (ALSFRS-R). Finally, in the subset of ALS patients with autopsy data, we tested if concentrations of plasma p-tau<sub>181</sub> related to neuron loss in the motor cortex or spinal cord.

## **2. Materials and methods**

### ***2.1 Participants***

Participants were 130 ALS patients who were seen at the the University of Pennsylvania ALS Center, Frontotemporal Degeneration Center, or AD Research Center; 82 AD patients and 33 non-impaired controls were included as reference groups. Inclusion criteria were a clinical diagnosis of ALS,<sup>6,15</sup> AD,<sup>16</sup> or normal cognition and plasma assayed for p-tau<sub>181</sub>. Informed consent was obtained according to the Declaration of Helsinki and approved by

the Penn Institutional Review Board. Targeted genetic screening for known ALS and AD mutations identified 32 *C9orf72* repeat expansions and 5 *SOD1* point mutations in ALS patients, and 2 *PSENI* mutations in AD patients.

Exclusion criterion for ALS patients was evidence of AD pathology, determined either by autopsy or by CSF amyloid- $\beta$  1-42 ( $A\beta_{42}$ ) $\leq 192$ ;<sup>17</sup> 60 ALS patients were clinically-defined only, with neither autopsy or CSF data. The exclusion criterion for AD patients was negative evidence of AD pathology, determined either by autopsy or by CSF  $A\beta_{42}$  $> 192$ . Exclusion criteria for controls was positive evidence of AD pathology, determined by CSF  $A\beta_{42}$  $\leq 192$ , or evidence of cognitive impairment, determined by mini-mental state exam (MMSE) $< 27$ .<sup>18</sup>

## **2.2 Neuropathological Assessment**

A subset of patients had autopsy-confirmed pathology (28 ALS; 25 AD). Neuropathological diagnosis of ALS was according to criteria.<sup>15,19</sup> Modern neuropathologic criteria for AD neuropathologic change (ADNC) were used to determine AD pathology;<sup>20</sup> AD patients had high/intermediate ADNC and ALS patients had not/low ADNC. Braak stage (0-VI) assessed extent of tau spread in both AD and ALS.<sup>21</sup> AD patients were Braak Stage V/VI (n=23); ALS patients were Braak Stage 0 (n=15), I/II (n=9), or III/IV (n=4). Neuronal loss was assessed in the motor cortex and anterior horn of the spinal cord in 26 ALS patients.<sup>22</sup>

## **2.3 Plasma and CSF collection and assay**

For all patients, p-tau<sub>181</sub> plasma concentrations were quantified using the single-molecule array (Simoa) platform, according to Advantage V2 Reagent Kits from Quanterix. Plasma NfL was also quantified using the Simoa Quanterix platform in a subset of ALS (n=120) and AD patients (n=70).

A subset of patients had CSF NfL data available, quantified using the Simoa Quanterix platform (12 ALS; 36 AD). CSF A $\beta$ <sub>42</sub> (50 ALS; 71 AD), p-tau<sub>181</sub> (47 ALS; 70 AD), and total tau (t-tau) (48 ALS; 69 AD) were quantified using the xMAP Luminex platform.<sup>23</sup> There was a mean of 13 months (SD=22.9) between plasma and CSF samples. A subset of these data is previously described.<sup>5</sup>

Technicians who performed biofluid analyses were blinded to clinical and pathological data.

#### ***2.4 Clinical Data***

Demographic characteristics were age at symptom onset (defined by the first reported symptom), age at plasma collection (years), duration at plasma (years from symptom onset to plasma collection), and survival (years from symptom onset to death). One patient was missing disease onset year; 11 were missing onset date.

Clinical characteristics were available for subsets of ALS patients, assessed at clinical visit closest to plasma collection (mean=0.8 months; SD=3.9): seated forced vital capacity (FVC; n=109),<sup>24</sup> revised ALS functional rating scale (ALSFRS-R; max score=48; n=118),<sup>25</sup> ALSFRS-R Progression Rate (48 - ALSFRS-R/duration at ALSFRS-R in months; n=115), change in weight from baseline (weight at visit - weight at initial visit; n=80), and Penn UMN Total Score closest to visit (max=32; n=114).<sup>26</sup> A neuromuscular examination by a board-certified neurologist tested for the presence or absence of UMN and LMN signs related to bulbar, cervical, thoracic, and lumbosacral regions (n=117); UMN thoracic was not assessed.<sup>27</sup> There was an average of 0.8 months (standard deviation [SD]=3.89) between plasma collection and ALS clinical visits.

Initial clinical diagnoses for ALS patients were recorded as ALS (n=82), progressive muscular atrophy (PMA; n=13),<sup>28</sup> primary lateral sclerosis (PLS; n=11),<sup>29</sup> frontotemporal dementia (FTD; n=6),<sup>30</sup> and progressive bulbar palsy (PBP; n=6).<sup>31</sup>

## **2.5 Statistical Analyses**

Non-parametric tests were used to account for non-normal distribution of demographic, clinical, and biofluid variables. All statistical tests were performed with a significance threshold of  $\alpha=0.05$ . Mann–Whitney–Wilcoxon tests performed comparisons between ALS and AD for continuous demographic variables and Chi-square tests compared categorical variables. For pairwise comparisons, effect sizes were calculated using rank-biserial correlation ( $r_{rb}$ ) ( $>0.1$  was considered small;  $>0.2$  medium;  $>0.3$  large)<sup>32</sup>. Missing data were dropped from analyses. Analyses were conducted using R version 4.1.2 (2021-11-01) statistical software and the `cutpointr`,<sup>33</sup> `effectsize`,<sup>34</sup> and `survival` packages.<sup>35</sup>

### **2.5.1 Analyte comparisons across ALS and AD; ALS and Controls**

Part 1 of this study tested for elevated plasma p-tau<sub>181</sub> in ALS. Wilcoxon tests performed planned pairwise comparisons of ALS to AD, and to Controls; CSF p-tau~181, plasma NfL and CSF NfL were included as reference analytes. We confirmed findings in the subset of autopsy-confirmed ALS patients with Braak Stage  $\leq$  II and autopsy-confirmed AD. Next, receiver operating characteristic (ROC) analyses tested diagnostic performance of p-tau<sub>181</sub> and NfL in both plasma and CSF when discriminating AD patients from ALS patients. ROC metrics were calculated using bootstrapping with 250 iterations: area under the curve (AUC), AUC 95% confidence interval (CI), and best threshold determined by Youden's index to maximize sensitivity and specificity.

### **2.5.2 Analyses of plasma p-tau<sub>181</sub> within ALS**

In part 2 of this study, we focused analyses within ALS patients to explore the clinical and pathological correlates of plasma p-tau<sub>181</sub>.

*Correlations between plasma and CSF.* We tested for a divergence between plasma p-tau<sub>181</sub> and CSF analytes in ALS using Spearman's rho correlations. We compared this to correlations between plasma NfL and CSF analytes.

*Associations with LMN and UMN signs.* Wilcoxon tests investigated whether p-tau<sub>181</sub> levels were associated with the presence/absence of LMN and/or UMN signs in ALS. To confirm findings, we also compared plasma p-tau<sub>181</sub> levels across onset site and across initial diagnoses in patients with an ultimate diagnosis of ALS. To test specificity of plasma p-tau<sub>181</sub> we included plasma NfL and CSF p-tau<sub>181</sub> as reference analytes.

Co-occurring tau pathology has sometimes been observed in ALS patients with cognitive impairment.<sup>36-38</sup> We therefore tested plasma p-tau<sub>181</sub> in patients with clinical diagnoses of ALS with mild cognitive impairment (ALS-MCI) or ALS with FTD (ALS-FTD) (n=37) compared to ALS patients without evidence of cognitive impairment (n=93).

*Clinical correlates of plasma p-tau<sub>181</sub>.* We tested how plasma p-tau<sub>181</sub> predicted clinical outcomes in ALS. Linear models then tested how plasma p-tau<sub>181</sub> related to each clinical outcome (ALSFRS-R, ALSFRS-R Progression Rate, change in weight, FVC, UMN Total). All linear models included the interval from plasma collection to clinical visit (years), disease duration (months), and sex (male, female) as covariates. To perform non-parametric linear models, all continuous variables were rank-transformed.<sup>39</sup>

*Pathological correlates of plasma p-tau<sub>181</sub>.* In the subset of autopsy patients with histopathological data, Spearman correlations tested associations between plasma p-tau<sub>181</sub> with neuron loss in the motor cortex and spinal cord. Finally to ensure that AD pathology did not explain variance in plasma levels observed in ALS, Kruskal-Wallis tests



investigated if plasma p-tau<sub>181</sub> differed by Thal Phase, CERAD score, or Braak Stage. All comparisons and linear models were also tested in plasma NfL and CSF p-tau.

### 3. Results

Table 1 summarizes demographic, CSF, and pathologic characteristics of ALS, AD and Controls. Of note, the majority of AD patients in our sample were early-onset (n=67; 82%), with age of onset  $\leq 65$ .

|                             | ALS                  | AD                   | Control              | p      |
|-----------------------------|----------------------|----------------------|----------------------|--------|
| n                           | 130                  | 82                   | 33                   |        |
| Age at Onset (years)        | 56.0 [50.0, 65.0]    | 57.0 [54.0, 63.0]    | --                   | 0.186  |
| Age at Plasma (years)       | 60.0 [53.0, 67.0]    | 62.0 [57.2, 68.8]    | 70.0 [65.0, 74.0]    | <0.001 |
| Sex = Male (%)              | 78 (60%)             | 41 (50%)             | 10 (30%)             | 0.008  |
| CSF A $\beta$ <sub>42</sub> | 288.0 [254.2, 328.2] | 143.0 [125.0, 166.5] | 299.3 [250.0, 374.0] | <0.001 |
| ADNC (%)                    |                      |                      |                      |        |
| Not                         | 16 (57%)             | 0 (0%)               | --                   |        |
| Low                         | 12 (43%)             | 0 (0%)               | --                   |        |
| Intermediate                | 0 (0%)               | 2 (8%)               | --                   |        |
| High                        | 0 (0%)               | 23 (92%)             | --                   |        |

**Table 1: Characteristics of AD and ALS patients.** Demographic, CSF, and pathological characteristics of patients. Missing data were dropped. For continuous variables, median and interquartile range (median [IQR]) are provided; *p*-values are reported for Mann-Whitney-Wilcoxon tests. For categorical variables, count and percentage (%) are provided; *p*-values are reported from chi-square tests.

#### 3.1 Plasma p-tau<sub>181</sub> in ALS compared with AD and non-impaired Controls

Figure 1 shows comparisons for biomarkers across ALS, AD and controls. Wilcoxon tests showed that plasma p-tau<sub>181</sub> was higher in ALS than controls (W=3297, *p*=0.0000020) with large effect size (*r*<sub>rb</sub>=0.54); in contrast, CSF p-tau<sub>181</sub> was lower in ALS than controls (W=250.5, *p*=0.00000028) with large effect size (*r*<sub>rb</sub>=0.54). Plasma p-tau<sub>181</sub> was higher in

AD than ALS ( $W=4305.5$ ,  $p=0.019$ ) with small effect size ( $r_{rb}=0.19$ ), while CSF p-tau<sub>181</sub> was significantly higher in AD than ALS ( $W=71.5$ ,  $p=2.1e-18$ ) with large effect size ( $r_{rb}=0.96$ ). As previously reported, NfL was higher in ALS than AD in both plasma ( $W=7395.5$ ,  $p=2.4e-18$ ;  $r_{rb}=0.76$ ) and CSF ( $W=350$ ,  $p=0.00095$ ;  $r_{rb}=0.62$ ).

To ensure elevated plasma p-tau<sub>181</sub> in ALS was not due to concomitant AD, we repeated analyses in the subset of autopsy-confirmed AD patients ( $n=25$ ) and in autopsy-confirmed ALS patients with minimal tau (Braak Stage 0/I/II) and minimal AD (not/low ADNC) ( $n=24$ ). A Wilcoxon test confirmed that plasma p-tau<sub>181</sub> levels were no different ( $W=279$ ,  $p=0.68$ ) between ALS (median=6.4; IQR=5.28) and AD (median=5; IQR=3).

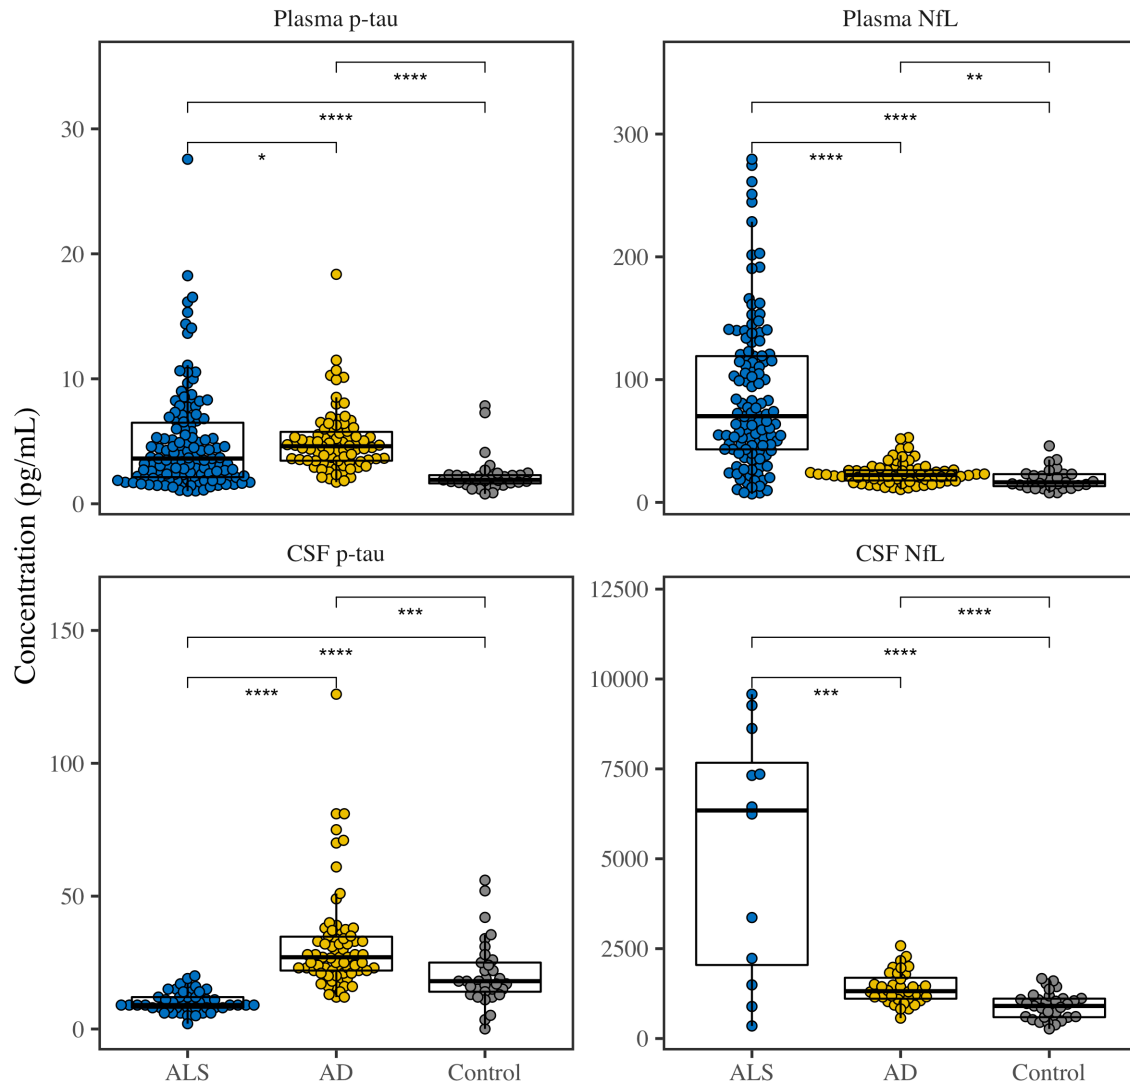

**Figure 1: Plasma and CSF p-tau<sub>181</sub> and NfL levels.** Comparisons of plasma concentrations (top panels) and CSF concentrations (bottom panels) of p-tau<sub>181</sub> (left panels) and NfL (right panels) across ALS (blue), AD (yellow), and Controls (grey). Asterisks represent *p*-values from Wilcoxon pairwise comparisons (\**p*<0.05, \*\**p*<0.01, \*\*\**p*<0.001, \*\*\*\**p*<0.0001). Boxplots show median and interquartile range (IQR).

Next, ROC analyses compared CSF and plasma metrics when discriminating ALS and AD.

Plasma p-tau<sub>181</sub> had the lowest diagnostic accuracy (AUC=0.60), highlighting that plasma p-tau<sub>181</sub> is elevated in both ALS and AD. Unlike plasma p-tau<sub>181</sub>, CSF p-tau<sub>181</sub> had

excellent diagnostic discrimination between AD and ALS (AUC=0.98), as did plasma NfL (AUC=0.88).

### ***3.2 Correlates of plasma p-tau<sub>181</sub> within ALS***

In part 2 of this study, we focused analyses within ALS patients to explore the clinical and pathological correlates of plasma p-tau<sub>181</sub>.

#### ***3.2.1 Associations of plasma with CSF in ALS***

To better understand the dissociation between plasma and CSF p-tau<sub>181</sub> in ALS, we tested correlations between plasma p-tau<sub>181</sub> and NfL with CSF analytes. Spearman's rho tests showed that plasma p-tau<sub>181</sub> was not correlated with any CSF metrics: CSF A $\beta$ <sub>42</sub> ( $p=0.70$ ), CSF p-tau<sub>181</sub> ( $p=0.90$ ), CSF t-tau ( $p=0.59$ ), or CSF NfL ( $p=0.99$ ). Plasma p-tau<sub>181</sub> was also not correlated with plasma NfL in ALS ( $p=0.32$ ). In contrast to the null results for plasma p-tau<sub>181</sub>, plasma NfL was positively correlated with both CSF t-tau ( $\rho=0.37$ ,  $p=0.0088$ ) and CSF NfL ( $\rho=0.69$ ,  $p=0.016$ ); plasma NfL was not significantly correlated with CSF A $\beta$ <sub>42</sub> ( $p=0.72$ ) or CSF p-tau<sub>181</sub> in ALS ( $p=0.82$ ).

#### ***3.2.2 Lower Motor Neuron (LMN) dysfunction in ALS***

We next tested if plasma p-tau<sub>181</sub> levels differed by the presence or absence of LMN and UMN signs in ALS (Figure 2A). To test specificity of plasma p-tau<sub>181</sub> findings, we also tested plasma NfL (Figure 2B) and CSF p-tau<sub>181</sub> (Figure 2C).

There were significantly elevated plasma p-tau<sub>181</sub> levels in ALS patients who showed motor examination findings of LMN signs related to cervical ( $W=827$ ,  $p=0.0072$ ;  $r_{rb}=0.34$ ), thoracic ( $W=469$ ,  $p=0.00025$ ;  $r_{rb}=0.52$ ), and lumbosacral regions ( $W=851$ ,  $p=0.0000029$ ;  $r_{rb}=0.51$ ); there was no difference based on presence or absence of bulbar LMN signs ( $p=0.089$ ). Plasma p-tau<sub>181</sub> was significantly lower for patients who were positive for UMN signs in bulbar ( $W=2126$ ,  $p=0.012$ ;  $r_{rb}=0.28$ ) and cervical regions

( $W=2258$ ,  $p=0.023$ ;  $r_{rb}=0.24$ ); there was no difference for UMN lumbosacral signs ( $p=0.71$ ).

In contrast to plasma p-tau<sub>181</sub>, plasma NfL levels (Figure 2B) did not differ based on LMN signs in cervical ( $p=0.87$ ), thoracic ( $p=0.27$ ), or lumbosacral regions ( $p=0.86$ ). Instead, NfL was elevated in patients positive for bulbar signs, both LMN ( $W=1019$ ,  $p=0.0034$ ;  $r_{rb}=0.32$ ) and UMN ( $W=935$ ,  $p=0.0041$ ;  $r_{rb}=0.33$ ), as well as cervical UMN signs ( $W=1062$ ,  $p=0.0057$ ;  $r_{rb}=0.31$ ); there was no difference based on lumbosacral UMN signs ( $p=0.15$ ). CSF p-tau<sub>181</sub> levels (Figure 2C) did not differ by UMN or LMN signs (all  $p>0.2$ ).

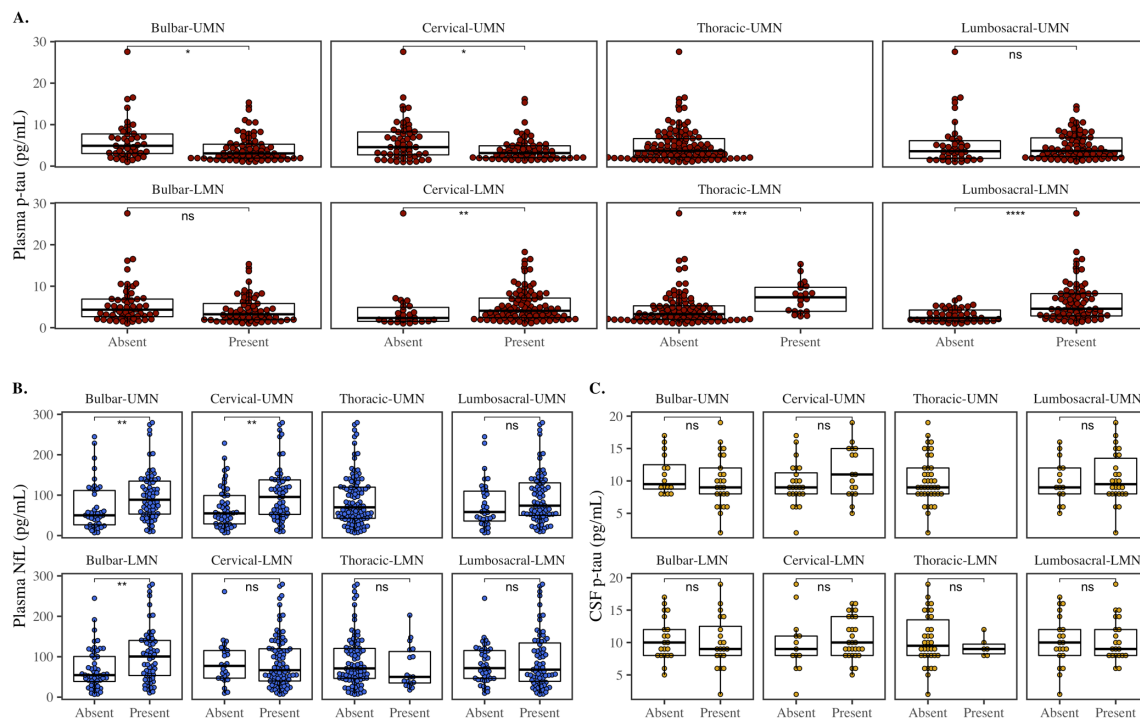

**Figure 2: Plasma and CSF levels by Motor Examination.** Comparisons of concentrations across UMN and LMN regions: (A.) p-tau<sub>181</sub> in red, (B.) plasma NfL in blue, and (C.) CSF p-tau<sub>181</sub> in yellow. Boxplots show median and interquartile range (IQR). Asterisks represent p-values from Wilcoxon pairwise comparisons ( $*p<0.05$ ,  $**p<0.01$ ,  $***p<0.001$ ,  $****p<0.0001$ , or not significant [ns]).

Results suggested that plasma p-tau<sub>181</sub> related to LMN limb/thorax dysfunction, a finding distinct from plasma NfL which related to both UMN and LMN bulbar signs. To test the consistency of this finding, we tested how plasma p-tau levels varied by initial diagnosis and onset sites. If plasma p-tau<sub>181</sub> is associated with LMN signs, then we expected higher levels of plasma p-tau<sub>181</sub> in ALS patients with a LMN onset or an initial diagnosis of PMA, compared to initial PLS or initial cognitive signs (FTD or PBA).

Patients with LMN limb onset in cervical and lumbosacral regions had higher median plasma p-tau<sub>181</sub> values than UMN onset (Figure 3A); only 1 patient had thoracic LMN onset, but this patient had relatively high plasma p-tau<sub>181</sub>. This difference in plasma p-tau<sub>181</sub> by LMN vs. UMN onset was confirmed by a Wilcoxon Test ( $W=271$ ,  $p=0.00052$ ) with large effect size ( $r_{rb}=0.52$ ). Neither plasma NfL ( $W=373$ ,  $p=0.097$ ) nor CSF p-tau<sub>181</sub> ( $p=0.86$ ) differed by LMN vs. UMN onset. However, plasma NfL medians were highest in patients with both UMN and LMN bulbar onset (Figure 3B); one patient with LMN thoracic onset also had high NfL levels.

Plasma p-tau<sub>181</sub> differed by initial diagnosis (Figure 3D), confirmed by a Kruskal-Wallis test ( $\chi^2(4)=18$ ,  $p=0.0011$ ). Planned pairwise comparisons showed that ALS patients with initial PMA, characterized by LMN-only onset, had significantly higher p-tau<sub>181</sub> levels than all other initial diagnoses, including PLS ( $W=9$ ,  $p=0.000078$ ;  $r_{rb}=0.87$ ), PBP ( $W=8$ ,  $p=0.0047$ ;  $r_{rb}=0.79$ ), FTD ( $W=13$ ,  $p=0.022$ ;  $r_{rb}=0.67$ ), and ALS ( $W=348.5$ ,  $p=0.046$ ;  $r_{rb}=0.35$ ). Plasma NfL also differed by initial diagnosis (Figure 3E;  $\chi^2(4)=14$ ,  $p=0.0072$ ), where an initial diagnosis of ALS was associated with the higher levels of plasma NfL than PMA ( $W=750$ ,  $p=0.0014$ ;  $r_{rb}=0.56$ ); no other groups were significantly different. CSF p-tau<sub>181</sub> did not vary by initial diagnosis (Fig 3F;  $p=0.65$ ).

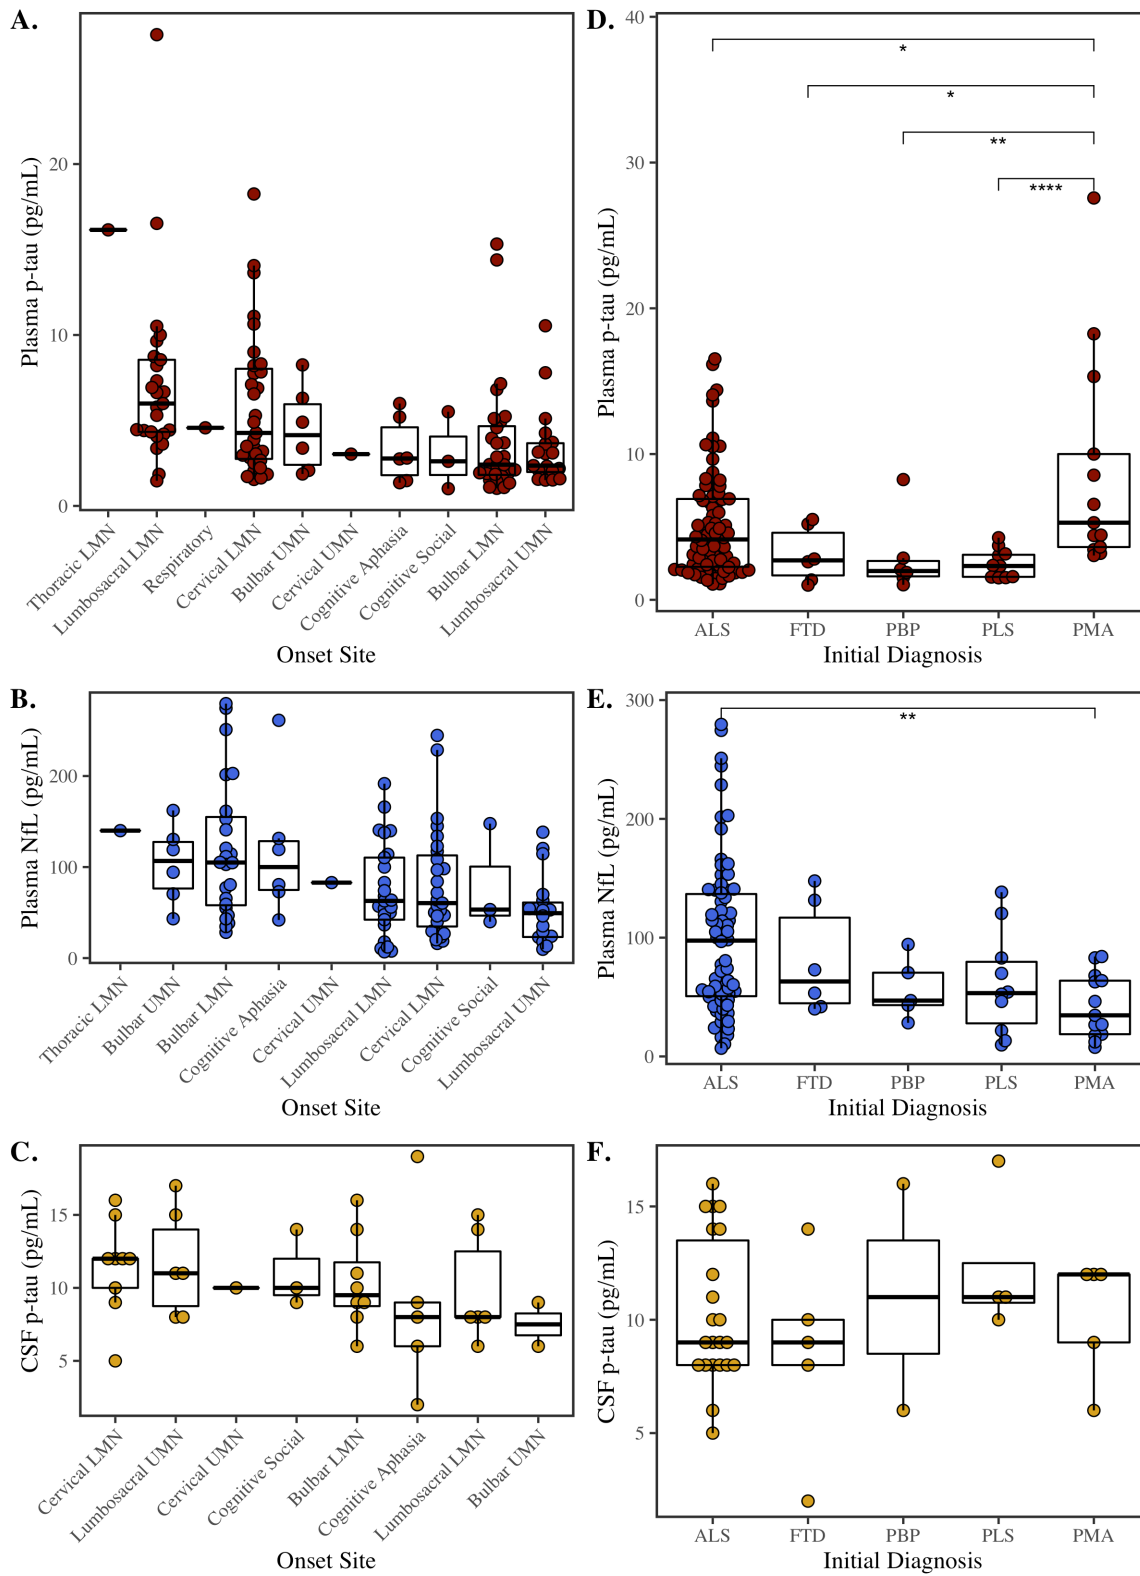

**Figure 3: Differences in plasma and CSF by initial diagnosis and by onset site.** Comparisons across onset site, ordered by highest-to-lowest median: (A.) plasma p-tau<sub>181</sub> in red, (B.) plasma NfL in blue, and (C.) CSF p-tau<sub>181</sub> in yellow. Comparisons across initial diagnosis in patients who convert to ALS: (D.) plasma p-tau<sub>181</sub> in red, (E.) plasma NfL in blue, and (F.) CSF p-tau<sub>181</sub> in yellow. Asterisks represent p-values from Wilcoxon pairwise comparisons (\* $p < 0.05$ , \*\* $p < 0.01$ , \*\*\* $p < 0.001$ , \*\*\*\* $p < 0.0001$ , or not significant [ns]). Boxplots show median, interquartile range (IQR), and outliers.

Finally, we tested if analyte levels differed in ALS patients with cognitive impairment (clinical diagnosis of ALS-FTD or ALS-MCI) compared to ALS patients without cognitive impairment.<sup>36-38</sup> A Wilcoxon test showed that plasma p-tau<sub>181</sub> levels were lower in ALS-MCI/ALS-FTD (median=2.8; IQR=2.54) compared to ALS without cognitive impairment (median=3.72; IQR=5.09) ( $W=2119$ ,  $p=0.04$ ), consistent with no association with UMN. For plasma NfL, there was no significant difference between ALS-MCI/ALS-FTD (median=80.6; IQR=55.5) and ALS (median=57.5; IQR=82.2) ( $W=1235$ ,  $p=0.088$ ); nor for CSF p-tau<sub>181</sub> ( $p=0.39$ ).

### 3.2.3 Clinical correlates of plasma p-tau<sub>181</sub>

We examined how demographic variables in ALS influenced plasma p-tau<sub>181</sub> within ALS. Plasma p-tau<sub>181</sub> was higher in men than women ( $W=1421.5$ ,  $p=0.0040$ ); the association with disease duration was not significant ( $\rho=0.17$ ,  $p=0.052$ ). Plasma p-tau<sub>181</sub> was not correlated with age at plasma collection ( $p=0.11$ ). Individuals with an *SOD1* point mutation, typically characterized by greater LMN dysfunction,<sup>40</sup> had significantly higher plasma p-tau<sub>181</sub> levels (median=6.93; IQR=1.85) than apparent sporadic individuals (median=3.44; IQR=4.22) ( $W=103.5$ ,  $p=0.046$ ); there was no difference between individuals with a *C9orf72* repeat expansion, typically characterized by greater UMN dysfunction, and apparent sporadic ALS individuals ( $p=0.38$ ).



We tested how plasma p-tau<sub>181</sub> correlated with clinical outcomes, with uncorrected Spearman correlations reported (Figure 4). Linear models tested each clinical outcome as a function of p-tau<sub>181</sub>, covarying for the interval from plasma to clinical collection, disease duration at clinical visit, and sex. More severe weight loss was significantly associated with increased plasma p-tau<sub>181</sub> ( $\beta=-0.24$ ,  $SE=0.074$ ,  $p=0.0019$ ); no other covariates were significant (all  $p>0.2$ ). Worse ALSFRS-R was significantly associated with increased plasma p-tau<sub>181</sub> ( $\beta=-0.17$ ,  $SE=0.081$ ,  $p=0.044$ ), covarying for plasma-to-visit interval ( $p=0.66$ ), disease duration ( $\beta=-0.37$ ,  $SE=0.087$ ,  $p=0.000035$ ), and sex ( $\beta=14$ ,  $SE=6$ ,  $p=0.024$ ). While the Spearman's correlation was not significant (see Figure 4), ALSFRS-R Progression Rate was significantly associated with plasma p-tau<sub>181</sub> ( $\beta=0.16$ ,  $SE=0.071$ ,  $p=0.025$ ), after covarying for plasma-to-visit interval ( $p=0.84$ ), disease duration ( $\beta=-0.6$ ,  $SE=0.076$ ,  $p=2.5e-12$ ), and sex ( $\beta=-14$ ,  $SE=5.3$ ,  $p=0.012$ ). Reduced FVC was significantly associated with increased plasma p-tau<sub>181</sub> ( $\beta=-0.25$ ,  $SE=0.086$ ,  $p=0.0045$ ); no other covariates were associated with FVC (all  $p>0.3$ ). UMN total score was inversely associated with plasma p-tau<sub>181</sub> ( $\beta=-0.22$ ,  $SE=0.083$ ,  $p=0.0095$ ) and was lower in men than women ( $\beta=-17$ ,  $SE=6.2$ ,  $p=0.0084$ ); no other covariates were associated with UMN total (all  $p>0.3$ ).

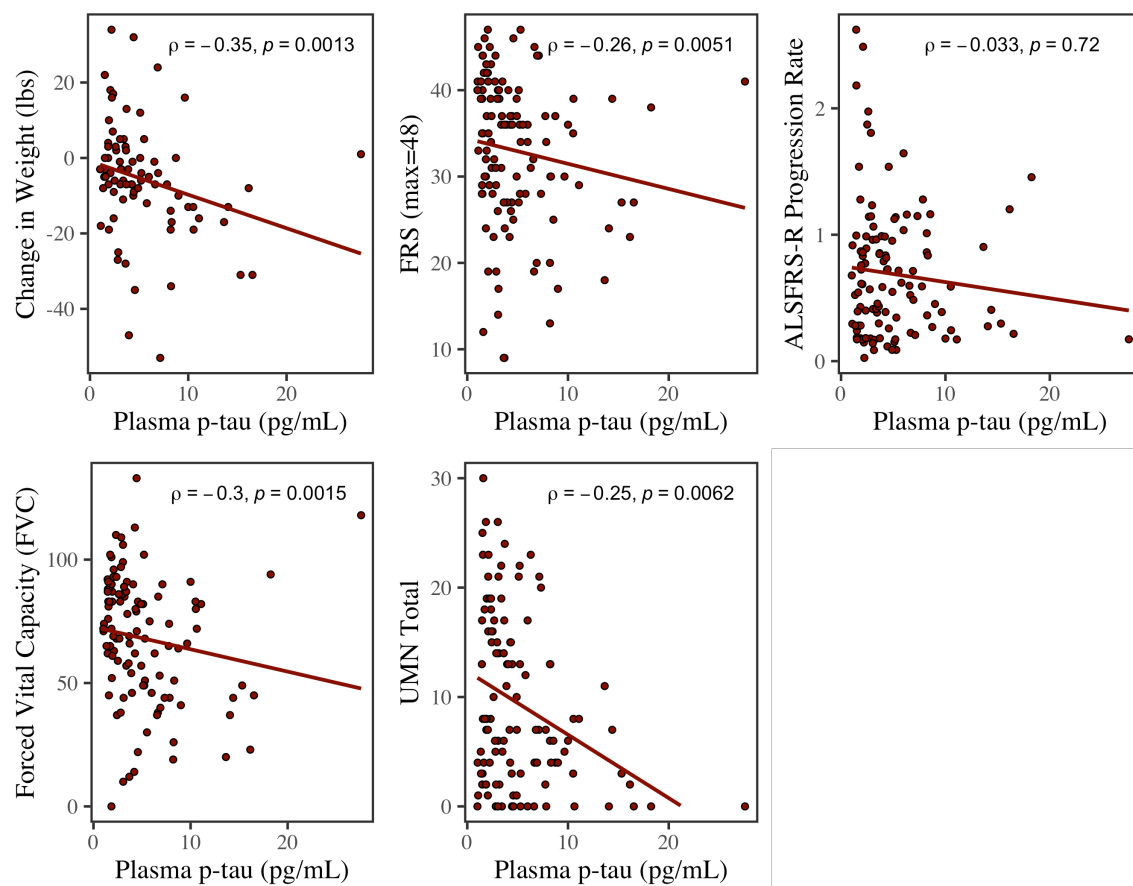

**Figure 4: Plasma levels by clinical outcomes.** Concentrations of plasma p-tau<sub>181</sub> across clinical outcomes: Change in Weight, ALSFRS-R, ALSFRS-R Progression Rate, Forced Vital Capacity (FVC), and Upper Motor Neuron (UMN) Total. Least squares regression lines are plotted in red; Spearman rho ( $\rho$ ) correlations are reported.

### 3.2.4 Pathological correlates of plasma p-tau<sub>181</sub> in autopsy-confirmed ALS

Spearman correlations indicated that increased p-tau<sub>181</sub> was associated with greater neuron loss in the spinal cord ( $\rho=0.46, p=0.017$ ), but was not significantly associated with motor cortex neuron loss ( $p=0.41$ ), further supporting the relationship with LMN disease (Figure 5).

Finally, Kruskal-Wallis tests showed that plasma p-tau<sub>181</sub> levels did not differ by Braak stage ( $p=0.57$ ), CERAD score ( $p=0.25$ ), or Thal phase ( $p=0.96$ ), further confirming that elevated plasma p-tau<sub>181</sub> in ALS was not due to low levels of ADNC in ALS patients.

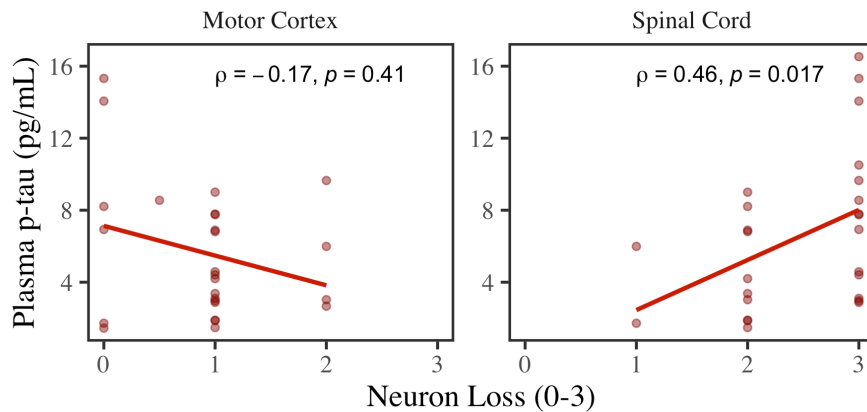

**Figure 5: Associations with atrophy in motor cortex and spinal cord.** Scatterplots of neuron loss (0-3) in motor cortex (left panel) and the anterior horn of the spinal cord (right panel) and their associations with plasma p-tau<sub>181</sub>. Least squares regression lines are plotted for each panel; Spearman rho ( $\rho$ ) correlations are reported.

#### 4. Discussion

While much work indicates that high p-tau<sub>181</sub> in plasma is an accurate marker of AD,<sup>1,2</sup> our study presents novel evidence that plasma p-tau<sub>181</sub> is also elevated in some ALS patients. Indeed, patients with ALS had significantly elevated plasma p-tau<sub>181</sub> levels compared to non-impaired healthy controls. While AD had higher plasma p-tau<sub>181</sub> than ALS, the effect size was small. Importantly, there was no difference in the subset of autopsy-confirmed AD and ALS, indicating that co-occurring AD was not driving elevated plasma p-tau<sub>181</sub> in ALS. Moreover, ROC analyses showed that plasma p-tau<sub>181</sub> had the poorest performance when discriminating ALS and AD patients (AUC=0.60). This is in contrast to CSF p-tau<sub>181</sub>, which was significantly higher in AD than ALS with large effect size and showed excellent discrimination (AUC=0.98). The divergence between plasma and CSF p-tau<sub>181</sub> within ALS was further confirmed by correlations that showed no associations between plasma p-tau<sub>181</sub> and any CSF biomarkers. In addition, we show strong and consistent evidence that plasma p-tau<sub>181</sub> was related to limb/thorax LMN dysfunction and degeneration in ALS: plasma p-

tau<sub>181</sub> was highest in ALS patients with an initial diagnosis of PMA, with limb LMN onset, and with LMN signs in cervical, thoracic, and lumbosacral regions. It was also inversely correlated with UMN total score,<sup>41</sup> and associated with greater neuronal loss in the spinal cord, but not with motor cortex. These associations with LMN disease were specific to plasma p-tau<sub>181</sub>, and CSF p-tau<sub>181</sub> was not associated with signs in ALS in this study or others.<sup>9</sup> Increased plasma p-tau<sub>181</sub> was also associated with ALS clinical outcomes – including weight loss, reduced FVC, and lower ALSFRS-R – and in patients with a *SOD1* mutation. Taken together, our study makes two important contributions: 1.) that elevated plasma p-tau<sub>181</sub> may not be specific to AD, and 2.) that elevated plasma p-tau<sub>181</sub> may be a biomarker of LMN dysfunction and degeneration in ALS.

We saw evidence that plasma p-tau and plasma NfL are two distinct, but informative, markers in ALS. Unlike plasma p-tau<sub>181</sub>, plasma NfL was higher in ALS than AD, had good discrimination (AUC=0.88), and was significantly correlated with CSF NfL. Our findings are corroborated by other studies showing elevated plasma NfL<sup>13</sup> and CSF NfL<sup>42,43</sup> in ALS, and that plasma and CSF NfL are correlated.<sup>44,45</sup> While the relationship between plasma p-tau<sub>181</sub> and LMN dysfunction was robust and consistently observed across our analyses, previous work has shown that CSF and serum NfL is associated with UMN disease in ALS.<sup>43,46</sup> Our data instead suggested that NfL was most consistently associated with both UMN and LMN bulbar signs, in addition to cervical UMN. Consistent with this finding, plasma NfL levels were highest in patients with bulbar onset. Thus, the relationship with LMN disease may be specific to plasma p-tau<sub>181</sub>, while plasma NfL may be most associated with bulbar onset and signs. Given the novelty of our findings, it will

be important to validate in an independent sample, and future studies should test plasma p-tau<sub>181</sub> as a marker of other motor neuron diseases or of axonal peripheral neuropathies.

Importantly, the mechanism for elevated plasma p-tau<sub>181</sub> in ALS must still be elucidated since ALS is typically associated with TDP-43 pathology.<sup>47</sup> While there is some evidence of hyperphosphorylated tau pathology in ALS,<sup>48,49</sup> this is typically observed in cases with cognitive impairment and FTD spectrum cases.<sup>36-38</sup> We saw no evidence that higher plasma p-tau<sub>181</sub> was linked to cognitive impairment in ALS, and we instead observed somewhat lower plasma p-tau levels in ALS-MCI/ALS-FTD patients. Our analyses show that higher plasma p-tau<sub>181</sub> was associated with neuron loss in the spinal cord, however the sample size was small and there were only 28 cases with postmortem assessments. Future histopathological studies should test if pathological accumulation or neurodegeneration in the spinal cord relates to plasma p-tau<sub>181</sub> levels in ALS. On the other end of the disease spectrum, it will be important to investigate plasma p-tau<sub>181</sub> as it relates to early disease in ALS. Here we studied plasma p-tau<sub>181</sub> in symptomatic ALS and AD, and ROC analyses showed poor discrimination by plasma p-tau<sub>181</sub>. While discrimination by plasma p-tau<sub>181</sub> is less useful for symptomatic ALS and AD, which are clinically distinct entities, this overlap in plasma p-tau<sub>181</sub> levels may be important to consider for prodromal/early-stages of disease. Prior work shows that plasma NfL was elevated in pre-symptomatic ALS patients who were less than 5 years from disease onset,<sup>13</sup> and is sensitive to ALS disease processes.<sup>14,50</sup> Future studies should test whether plasma p-tau<sub>181</sub> is elevated in pre-symptomatic individuals with a familial history of ALS.

There are some caveats to our findings. First, we had no a priori hypothesis that plasma p-tau<sub>181</sub> levels were elevated in ALS, and the mechanism for this effect is still unknown;

findings should be validated in an independent sample. Second, the number of ALS patients with postmortem pathological data was small, and this limited our ability to investigate the association with spinal cord pathology that was specific to increased plasma p-tau<sub>181</sub> in ALS. Future studies should test for a dissociation between plasma p-tau<sub>181</sub> and plasma NfL related to pathology accumulation and degeneration in the spinal cord and LMN compared to the motor cortex. Despite only a subset of patients having postmortem pathological data, we repeated analyses in the subset of autopsy-confirmed ALS with low/not ADNC and found levels of plasma p-tau<sub>181</sub> were similarly elevated compared to AD. This confirmed that high levels of plasma p-tau<sub>181</sub> were not explained by co-occurring ADNC. Third, only a subset of our sample had CSF data. Even so, our data are supported by previous literature which finds that CSF p-tau<sub>181</sub> is reduced in ALS compared to AD.<sup>8,9</sup> Only 12 patients had both CSF NfL data and ALS clinical data, which precluded our ability to test for differences versus agreement between CSF NfL and plasma NfL related to LMN disease, UMN disease, and clinical outcomes in ALS. Fourth, we tested analyte levels by the presence or absence of LMN and UMN symptoms, however future studies should examine how plasma biomarkers in ALS relate to continuous metrics of UMN and LMN neurophysiology.<sup>51</sup> Biomarkers of ALS are still needed to provide an early diagnosis, and to inform disease management and eligibility criteria for treatment trials. Moreover, because plasma is a minimally invasive biomarker available through blood draw, it is more easily collected repeatedly and in pre-symptomatic cases. Our study shows novel evidence that plasma p-tau<sub>181</sub> is highly elevated in ALS and may be sensitive to LMN disease in ALS. Moreover, plasma p-tau<sub>181</sub> as a marker of LMN disease may be complimentary to plasma NfL in ALS.

## **Acknowledgements/Conflicts/Funding Sources**

This work is supported by funding from the National Institute of Aging (P01-AG066597, U19-AG062418, P30-AG072979, R01-AG054519, R01-AG052943) and the Penn Institute on Aging. KAQC is supported by the Alzheimer's Association (AARF-D-619473, AARF-D-619473-RAPID) and P30-AG072979. TFT is supported by the NIH/NINDS (K23-NS11416-01A1).

### ***Author Contributions***

KAQC, DJI, and CM had major contributions to the conception of the research question. KAQC, LMS, SS, DJI, MG, and CM all contributed to the methodology and design of the study. All authors, KAQC, LMS, SS, DJI, LD, LBE, CQ, DAA, LR, MG, DAW, TFT, AC, EBL, and CM, were involved in data acquisition. KAQC performed all formal statistical analyses and investigations in this study. KAQC prepared the original manuscript draft. All authors, KAQC, LMS, SS, DJI, LD, LBE, CQ, DAA, LR, MG, DAW, TFT, AC, EBL, and CM, were involved in manuscript review and editing and have approved the final draft.

### ***Potential Conflicts of Interest***

LD receives consulting fees from Passage Bio and has received honoraria from the Muscular Dystrophy Association and National Society of Genetic Counselors. TFT has received research support from the Parkinson Foundation and The Michael J Fox Foundation. He has received consulting fees and honoraria from the Parkinson Foundation and Sanofi Genzyme. All other authors have no conflicts of interest to report.

## References

1. Brickman AM, Manly JJ, Honig LS, et al. Plasma p-tau181, p-tau217, and other blood-based Alzheimer's disease biomarkers in a multi-ethnic, community study. *Alzheimer's and Dementia* 2021;(September 2020):1–12.
2. Lantero Rodriguez J, Karikari TK, Suárez-Calvet M, et al. Plasma p-tau181 accurately predicts Alzheimer's disease pathology at least 8 years prior to post-mortem and improves the clinical characterisation of cognitive decline [Internet]. *Acta Neuropathologica* 2020;140(3):267–278. Available from: <https://doi.org/10.1007/s00401-020-02195-x>
3. Thijssen EH, La Joie R, Strom A, et al. Plasma phosphorylated tau 217 and phosphorylated tau 181 as biomarkers in Alzheimer's disease and frontotemporal lobar degeneration: a retrospective diagnostic performance study. *The Lancet Neurology* 2021;20(9):739–752.
4. Janelidze S, Mattsson N, Palmqvist S, et al. Plasma P-tau181 in Alzheimer's disease: relationship to other biomarkers, differential diagnosis, neuropathology and longitudinal progression to Alzheimer's dementia [Internet]. *Nature Medicine* 2020;26(3):379–386. Available from: <http://dx.doi.org/10.1038/s41591-020-0755-1>
5. Tropea TF, Waligorska T, Xie SX, et al. Plasma Phosphorylated Tau181 is a Biomarker of Alzheimer's Disease Pathology and Associated with Cognitive and Functional Decline. 2022;
6. Strong MJ, Abrahams S, Goldstein LH, et al. Amyotrophic lateral sclerosis-frontotemporal spectrum disorder (ALS-FTSD): Revised diagnostic criteria [Internet]. *Amyotrophic lateral sclerosis and frontotemporal degeneration* 2017;18(3-4):153–174. Available from: <https://www.tandfonline.com/doi/full/10.1080/21678421.2016.1267768>
7. Liscic RM, Breljak D. Molecular basis of amyotrophic lateral sclerosis [Internet]. *Progress in Neuro-Psychopharmacology and Biological Psychiatry* 2011;35(2):370–372. Available from: <https://www.sciencedirect.com/science/article/pii/S0278584610002800>
8. Grossman M, Elman L, McCluskey L, et al. Phosphorylated tau as a candidate biomarker for amyotrophic lateral sclerosis. *JAMA neurology* 2014;71(4):442–448.
9. Scarafino A, D'Errico E, Introna A, et al. Diagnostic and prognostic power of CSF Tau in amyotrophic lateral sclerosis. *Journal of neurology* 2018;265(10):2353–2362.
10. Thijssen EH, La Joie R, Wolf A, et al. Diagnostic value of plasma phosphorylated tau181 in Alzheimer's disease and frontotemporal lobar degeneration. *Nature Medicine* 2020;26(3):387–397.
11. Cousins KAQ, Irwin DJ, Wolk DA, et al. ATN status in amnesic and non-amnesic Alzheimer's disease and frontotemporal lobar degeneration. *Brain* 2020;143(7):2295–2311.
12. Lu C-H, Macdonald-Wallis C, Gray E, et al. Neurofilament light chain: a prognostic biomarker in amyotrophic lateral sclerosis. *Neurology* 2015;84(22):2247–2257.



13. Bjornevik K, O'Reilly EJ, Molsberry S, et al. Prediagnostic Neurofilament Light Chain Levels in Amyotrophic Lateral Sclerosis. *Neurology* 2021;97(15):e1466–e1474.
14. Forgrave LM, Ma M, Best JR, DeMarco ML. The diagnostic performance of neurofilament light chain in CSF and blood for Alzheimer's disease, frontotemporal dementia, and amyotrophic lateral sclerosis: A systematic review and meta-analysis. *Alzheimer's & Dementia: Diagnosis, Assessment & Disease Monitoring* 2019;11:730–743.
15. Brooks BR, Miller RG, Swash M, Munsat TL. El Escorial revisited: revised criteria for the diagnosis of amyotrophic lateral sclerosis. *Amyotrophic lateral sclerosis and other motor neuron disorders : official publication of the World Federation of Neurology, Research Group on Motor Neuron Diseases* 2000;1(5):293–299.
16. McKhann GM, Knopman DS, Chertkow H, et al. The diagnosis of dementia due to Alzheimer's disease: Recommendations from the National Institute on Aging-Alzheimer's Association workgroups on diagnostic guidelines for Alzheimer's disease. *Alzheimer's & dementia: the journal of the Alzheimer's Association* 2011;7(3):263–269.
17. Shaw LM, Vanderstichele H, Knapik-Czajka M, et al. Cerebrospinal fluid biomarker signature in alzheimer's disease neuroimaging initiative subjects [Internet]. *Annals of Neurology* 2009;65(4):403–413. Available from: <https://arxiv.org/abs/PMCID:PMC2696350>
18. Crum RM, Anthony JC, Bassett SS, Folstein MF. Population-based norms for the Mini-Mental State Examination by age and educational level. *Jama* 1993;269(18):2386–2391.
19. Brooks BR. El Escorial World Federation of Neurology criteria for the diagnosis of amyotrophic lateral sclerosis. Subcommittee on Motor Neuron Diseases/Amyotrophic Lateral Sclerosis of the World Federation of Neurology Research Group on Neuromuscular Diseases and th. *Journal of the neurological sciences* 1994;124:96–107.
20. Montine TJ, Phelps CH, Beach TG, et al. National institute on aging-Alzheimer's association guidelines for the neuropathologic assessment of Alzheimer's disease: A practical approach. *Acta Neuropathologica* 2012;123(1):1–11.
21. Braak H, Braak E. Neuropathological staging of Alzheimer-related changes. *Acta neuropathologica* 1991;82(4):239–259.
22. Brettschneider J, Del Tredici K, Irwin DJ, et al. Sequential distribution of pTDP-43 pathology in behavioral variant frontotemporal dementia (bvFTD). *Acta neuropathologica* 2014;127(3):423–439.
23. Shaw LM, Vanderstichele H, Knapik-Czajka M, et al. Qualification of the analytical and clinical performance of CSF biomarker analyses in ADNI. *Acta neuropathologica* 2011;121(5):597–609.
24. Czaplinski A, Yen AA, Appel SH. Forced vital capacity (FVC) as an indicator of survival and disease progression in an ALS clinic population. *Journal of Neurology, Neurosurgery & Psychiatry* 2006;77(3):390–392.

25. Cedarbaum JM, Stambler N, Malta E, et al. The ALSFRS-R: A revised ALS functional rating scale that incorporates assessments of respiratory function. *Journal of the Neurological Sciences* 1999;169(1-2):13–21.
26. Quinn C, Edmundson C, Dahodwala N, Elman L. Reliable and efficient scale to assess upper motor neuron disease burden in amyotrophic lateral sclerosis. *Muscle & nerve* 2020;61(4):508–511.
27. Gromicho M, Figueiral M, Uysal H, et al. Spreading in ALS: The relative impact of upper and lower motor neuron involvement. *Annals of clinical and translational neurology* 2020;7(7):1181–1192.
28. Visser J, Berg-Vos RM van den, Franssen H, et al. Disease course and prognostic factors of progressive muscular atrophy. *Archives of neurology* 2007;64(4):522–528.
29. Gordon PH, Cheng B, Katz IB, et al. The natural history of primary lateral sclerosis. *Neurology* 2006;66(5):647–653.
30. Ahmed RM, Devenney EM, Strikwerda-Brown C, et al. Phenotypic variability in ALS-FTD and effect on survival. *Neurology* 2020;94(19):e2005–e2013.
31. Karam C, Scelsa SN, Macgowan DJL. The clinical course of progressive bulbar palsy. *Amyotrophic Lateral Sclerosis* 2010;11(4):364–368.
32. Funder DC, Ozer DJ. Evaluating Effect Size in Psychological Research: Sense and Nonsense [Internet]. *Advances in Methods and Practices in Psychological Science* 2019;2(2):156–168. Available from: <https://doi.org/10.1177/2515245919847202>
33. Thiele C, Hirschfeld G. Cutpointr: Improved estimation and validation of optimal cutpoints in R. *Journal of Statistical Software* 2021;98(11):1–27.
34. Ben-Shachar M, Lüdtke D, Makowski D. effectsize: Estimation of Effect Size Indices and Standardized Parameters [Internet]. *Journal of Open Source Software* 2020;5(56):2815. Available from: <https://github.com/easystats/effectsize>
35. Therneau TM. A package for survival analysis in R [Internet]. R package version 2021; Available from: <https://cran.r-project.org/package=survival%3E>
36. Strong MJ, Yang W, Strong WL, et al. Tau protein hyperphosphorylation in sporadic ALS with cognitive impairment. *Neurology* 2006;66(11):1770–1771.
37. Strong MJ, Donison NS, Volkening K. Alterations in Tau Metabolism in ALS and ALS-FTSD. *Frontiers in Neurology* 2020;11:1548.
38. Yang W, Strong MJ. Widespread neuronal and glial hyperphosphorylated tau deposition in ALS with cognitive impairment. *Amyotrophic Lateral Sclerosis* 2012;13(2):178–193.
39. Conover WJ, Iman RL. Rank transformations as a bridge between parametric and nonparametric statistics. *The American Statistician* 1981;35(3):124–129.
40. Garg N, Park SB, Vucic S, et al. Differentiating lower motor neuron syndromes. *Journal of Neurology, Neurosurgery & Psychiatry* 2017;88(6):474–483.
41. Rösler KM, Truffert A, Hess CW, Magistris MR. Quantification of upper motor neuron loss in amyotrophic lateral sclerosis. *Clinical neurophysiology* 2000;111(12):2208–2218.
42. Cousins KAQ, Phillips JS, Irwin DJ, et al. ATN incorporating cerebrospinal fluid neurofilament light chain detects frontotemporal lobar degeneration. *Alzheimer's & Dementia* 2021;17(5):822–830.

43. Gaiani A, Martinelli I, Bello L, et al. Diagnostic and prognostic biomarkers in amyotrophic lateral sclerosis: neurofilament light chain levels in definite subtypes of disease. *JAMA neurology* 2017;74(5):525–532.
44. Huang F, Zhu Y, Hsiao-Nakamoto J, et al. Longitudinal biomarkers in amyotrophic lateral sclerosis. *Annals of clinical and translational neurology* 2020;7(7):1103–1116.
45. Illán-Gala I, Lleo A, Karydas A, et al. Plasma tau and neurofilament light in frontotemporal lobar degeneration and Alzheimer disease. *Neurology* 2021;96(5):e671–e683.
46. Gille B, De Schaepdryver M, Goossens J, et al. Serum neurofilament light chain levels as a marker of upper motor neuron degeneration in patients with amyotrophic lateral sclerosis. *Neuropathology and applied neurobiology* 2019;45(3):291–304.
47. Al-Chalabi A, Jones A, Troakes C, et al. The genetics and neuropathology of amyotrophic lateral sclerosis. *Acta neuropathologica* 2012;124(3):339–352.
48. Stevens CH, Guthrie NJ, Roijen M van, et al. Increased tau phosphorylation in motor neurons from clinically pure sporadic amyotrophic lateral sclerosis patients. *Journal of Neuropathology & Experimental Neurology* 2019;78(7):605–614.
49. Vintilescu CR, Afreen S, Rubino AE, Ferreira A. The Neurotoxic Tau 45-230 Fragment Accumulates in Upper and Lower Motor Neurons in Amyotrophic Lateral Sclerosis Subjects. *Molecular Medicine* 2016;22(1):477–486.
50. Ashton NJ, Janelidze S, Al Khleifat A, et al. A multicentre validation study of the diagnostic value of plasma neurofilament light. *Nature communications* 2021;12(1):1–12.
51. Vucic S, Rutkove SB. Neurophysiological biomarkers in amyotrophic lateral sclerosis. *Current opinion in neurology* 2018;31(5):640–647.
